# Supplementary material for: An NKX-COUP-TFII morphogenetic code directs mucosal endothelial addressin expression
Source: PubMed Central journal article supplement (PMC9718832; doi:10.1038/s41467-022-34991-2), 2022-12-02
Supplement: 41467_2022_34991_MOESM1_ESM.pdf [file 41467_2022_34991_MOESM1_ESM.pdf]

**A**

CE : CCATG**CACTT**GACCCACCATGG**TGACCC**ACCTCC  
 CE\_ΔE/N : CCATG**gtCT**TGACCCACCATGG**TGACCC**ACCTCC  
 CE\_ΔC\_AB : CCATG**CACTT**G**aaaAaa**ATGG**aa**ACCCACCTCC

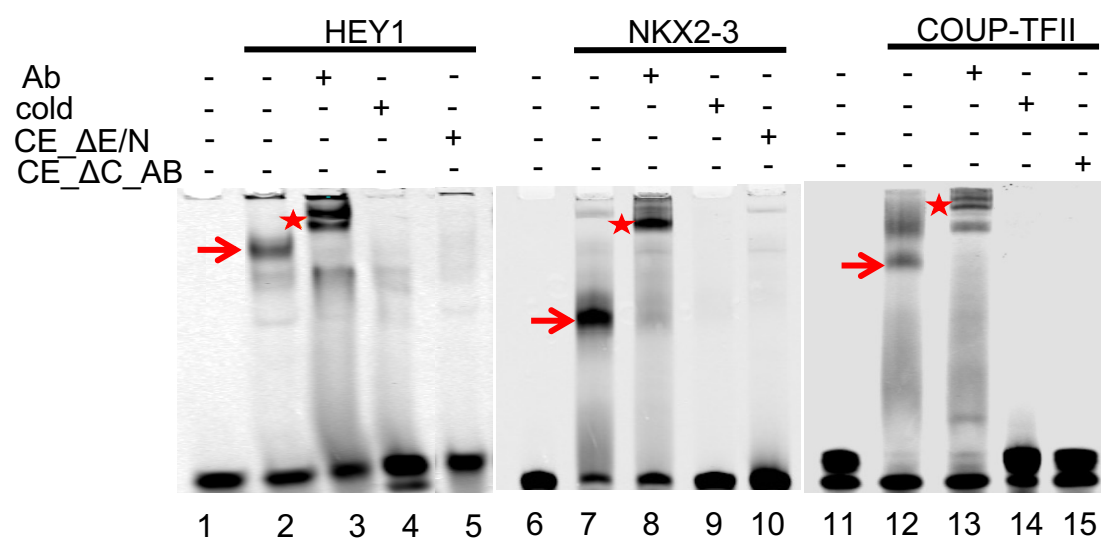**B**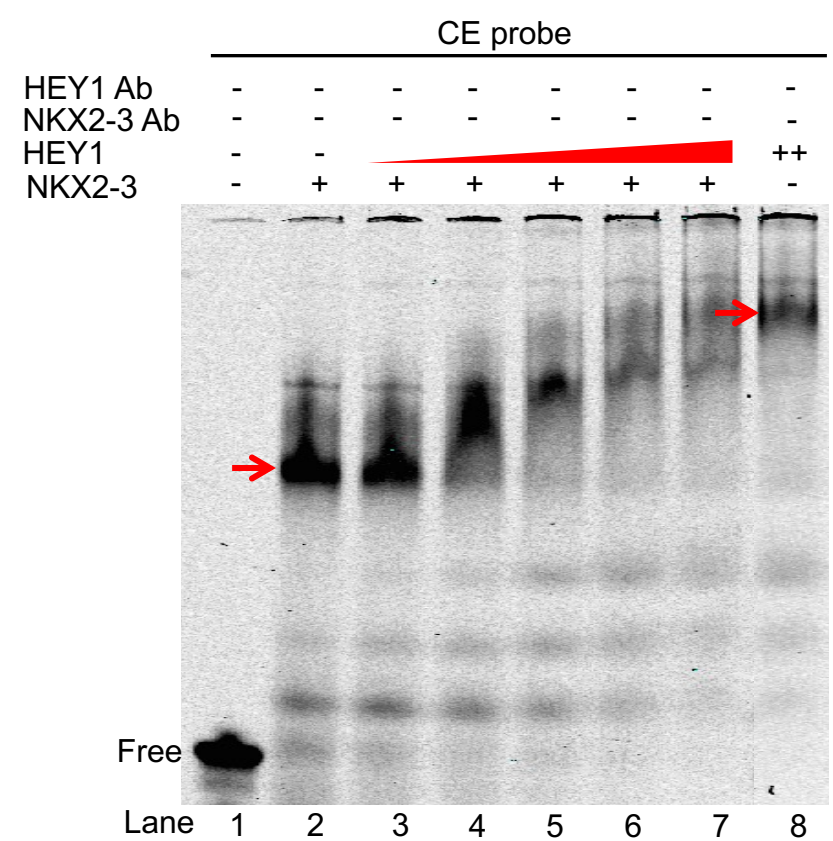

**Figure S1. The *Madcam1* CE binds NKX2-3, COUP-TFII and HEY1.**

(A) Sequence for the wildtype probe (CE) and mutant probes used for EMSA. CE\_ΔE/N harbors mutations in the HEY1 and NKX2-3 binding site; CE\_ΔC\_AB harbors mutations in the COUP-TFII “A” and “B” sites. Red, purple and green bars denote the HEY1, NKX2-3 and COUP-TFII binding sites, respectively. EMSA showing migration of recombinant HEY1, NKX2-3 and COUP-TFII-GST bound to the CE probe (red arrows), supershifted by antibodies specific to the corresponding transcription factor (red stars). Cold competitor probe outcompeted the CE probe (lanes 4, 9, 14). Mutated probes lacking the HEY1 and NKX2-3 sites (CE\_ΔE/N, lanes 5 and 10) or the COUP-TFII sites (CE\_ΔC\_AB, lane 15) failed to bind the respective TFs.

(B) EMSA showing migration of recombinant HEY1 and NKX2-3 bound to the CE probe (arrows). Progressive shift in migration indicates displacement of NKX2-3 by co-incubation with increasing concentrations of HEY1.

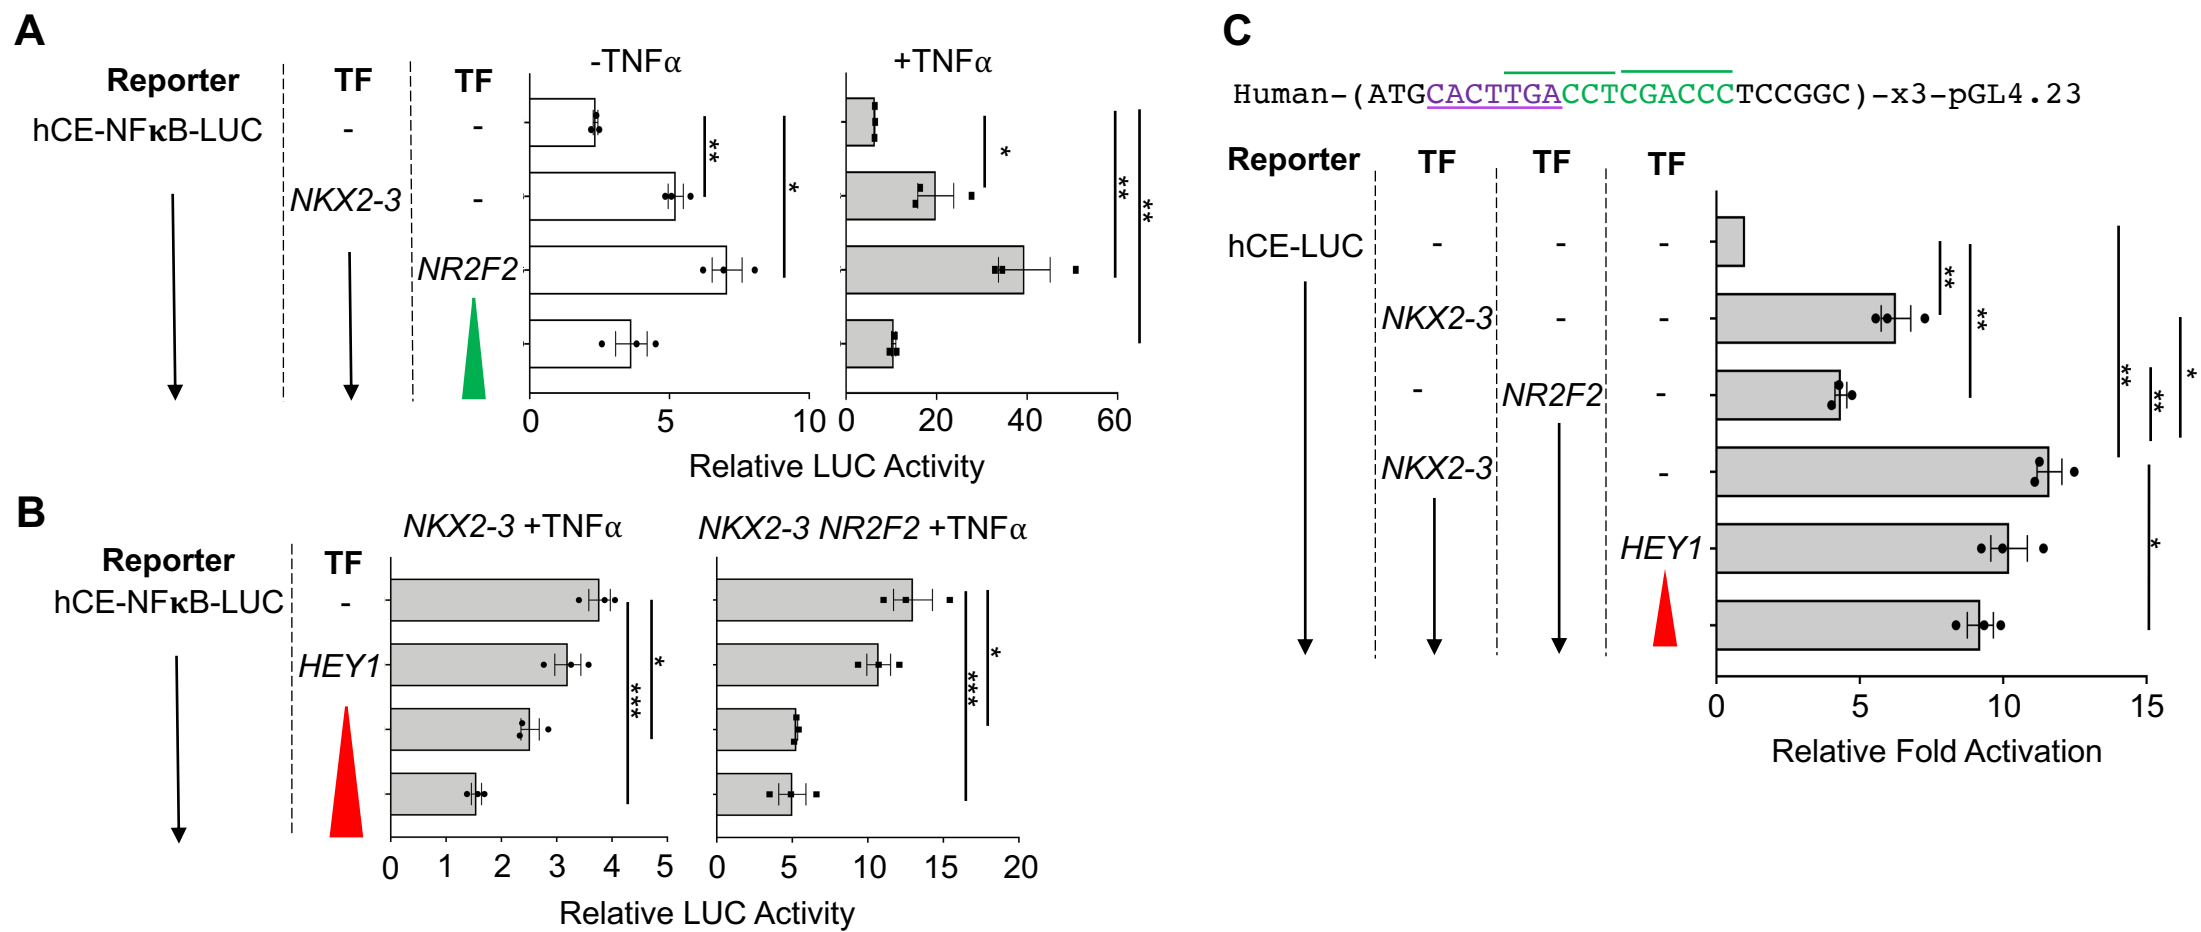

**Figure S2. Functional properties of *MADCAM1* CE in human.**

(A) Activity of luciferase reporter driven by CE-containing human *MADCAM1* promoter is enhanced by *NKX2-3* cooperatively with *NR2F2* in 293T cells.

(B) *HEY1* dose-dependently suppresses activation of the *MADCAM1* reporter, when co-transfected with *NKX2-3* (left) or with *NKX2-3* and *NR2F2* (right) in 293T cells.

(C) Activity of luciferase reporter driven by promoter with three copies of the human *MADCAM1* CE sequence fused in tandem, when co-expressed with *NKX2-3*, *NR2F2* and *HEY1* in 293T cells.

All data are mean  $\pm$  SEM of three independent experiments unless stated otherwise. \*\*\*: p-value <0.005, \*\*: p-value <0.01, \*: p-value <0.05. Two tailed t-test, paired.

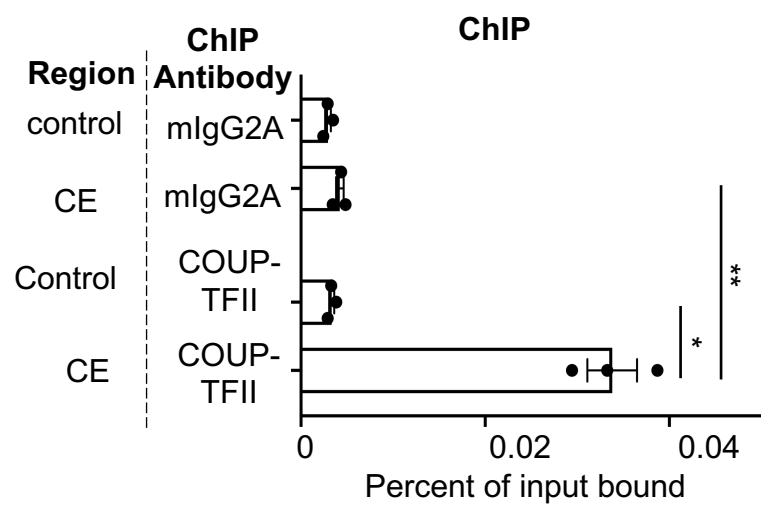

**Figure S3. COUP-TFII binds to the endogenous *Madcam1* NCCE in DN-MAML bEnd.3 cells.**

Anti-COUP-TFII chromatin immunoprecipitation from nuclei of DN-MAML bEnd.3 cells enriches for the CE. Real-time PCR using primers for the CE was performed on the input and immunoprecipitated DNA fractions and results were shown as percent of input CE DNA. Precipitation of an irrelevant genomic control region without a COUP-TFII binding site was used as a negative control. Results are representative of three independent experiments.

All data are mean  $\pm$  SEM of three independent experiments unless stated otherwise. \*\*: p-value<0.01, \*: p-value<0.05. Two tailed t-test, paired.

**A**

CE: GAGGCTGGTCA**GAGAAGTG**TGAAAAG  
 CE $\Delta$ N: GAGGCTGGTCA**GAGAA**aaaaaAAAAG  
 CE $\Delta$ C: GAGGCT**Taaaa****GAGAAGTG**TGAAAAG

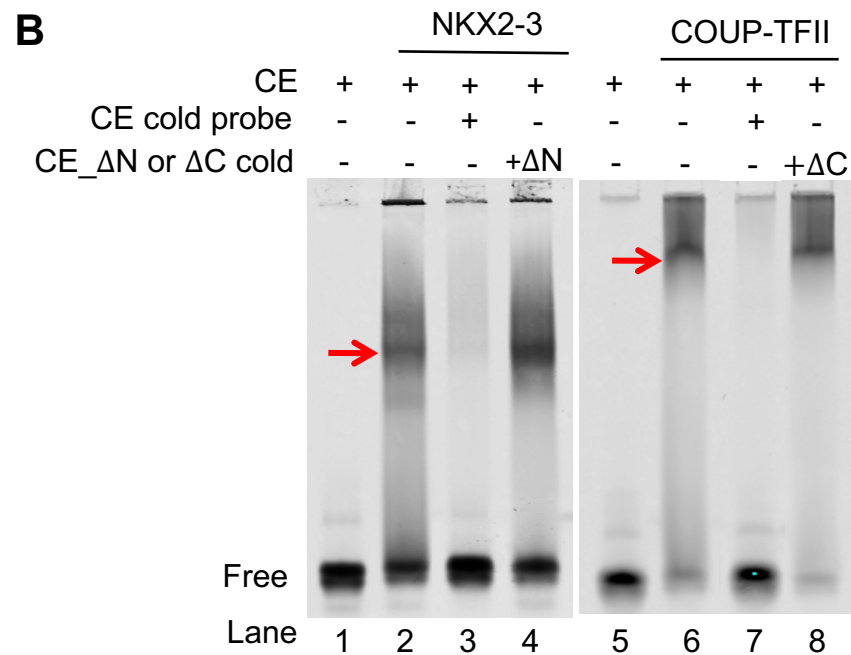

**Figure S4. NKX2-3 and COUP-TFII bind the conserved *St6gal1* intronic NCCE**

(A) Sequence of wildtype and mutant CE probes for EMSA. CE\_ $\Delta$ N harbors mutations in the NKX2-3 binding site; CE\_ $\Delta$ C harbors mutations in the COUP-TFII binding site.

(B) EMSA illustrating NKX2-3-HIS and COUP-TFII-GST recombinant proteins binding to the *St6gal1* WT probe (red arrows). Cold WT probe outcompeted the CE probe, while mutated probes (CE\_ $\Delta$ N or CE\_ $\Delta$ C) failed to compete against the WT CE probe.



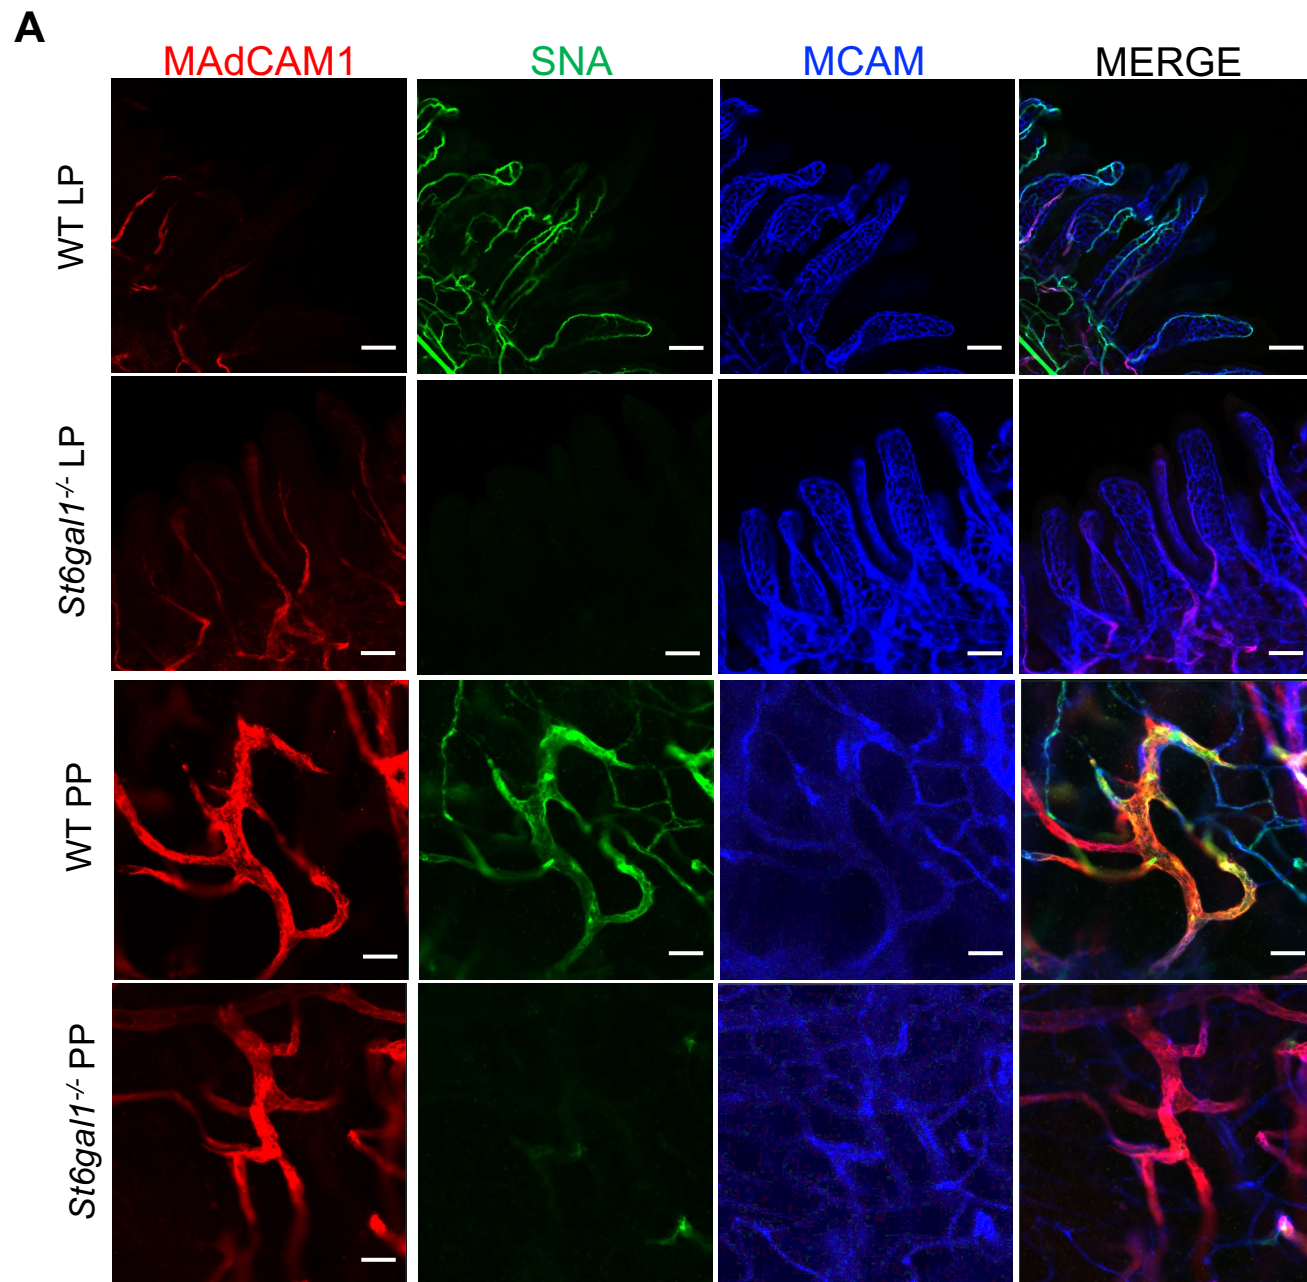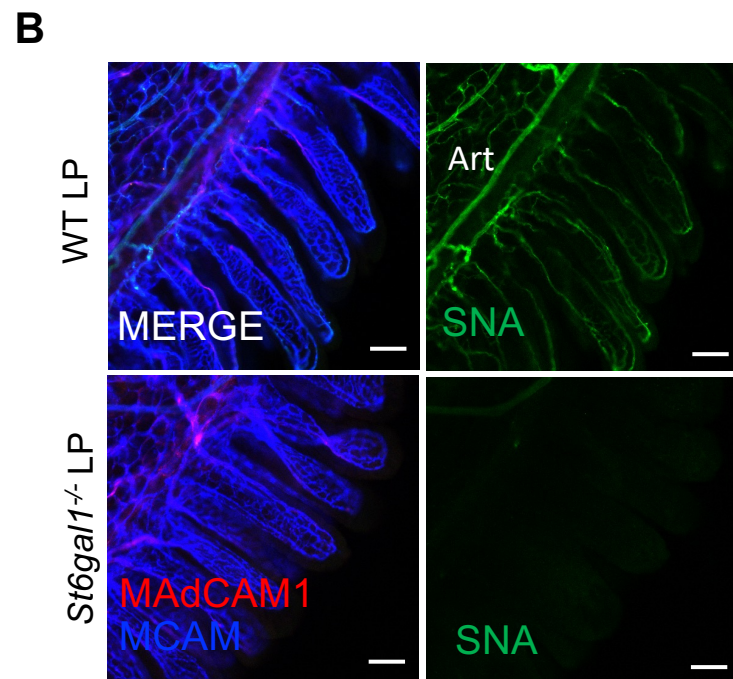

**Figure S5. *St6gal*-dependent SNA binding to vascular endothelium in PP and LP.**

(A) Binding of the alpha-2,6-sialic acid-specific lectin SNA to the LP and PP HEV in WT vs *St6gal1*<sup>-/-</sup> mice. Mice were injected with pan-EC anti-MCAM (CD146, blue) and AF450-labeled anti-addressin antibodies MECA89 and MECA367 to label HEV (red), followed by vascular perfusion with AF488-labeled SNA lectin (green). Scale bars: 100 $\mu$ m, 10x (top two rows), 50 $\mu$ m, 20x (bottom two rows); whole mount imaging. (B) SNA stains the artery (Art) in WT but not *St6gal1*<sup>-/-</sup> mice. Whole mount, 10x, scale bars: 100 $\mu$ m.



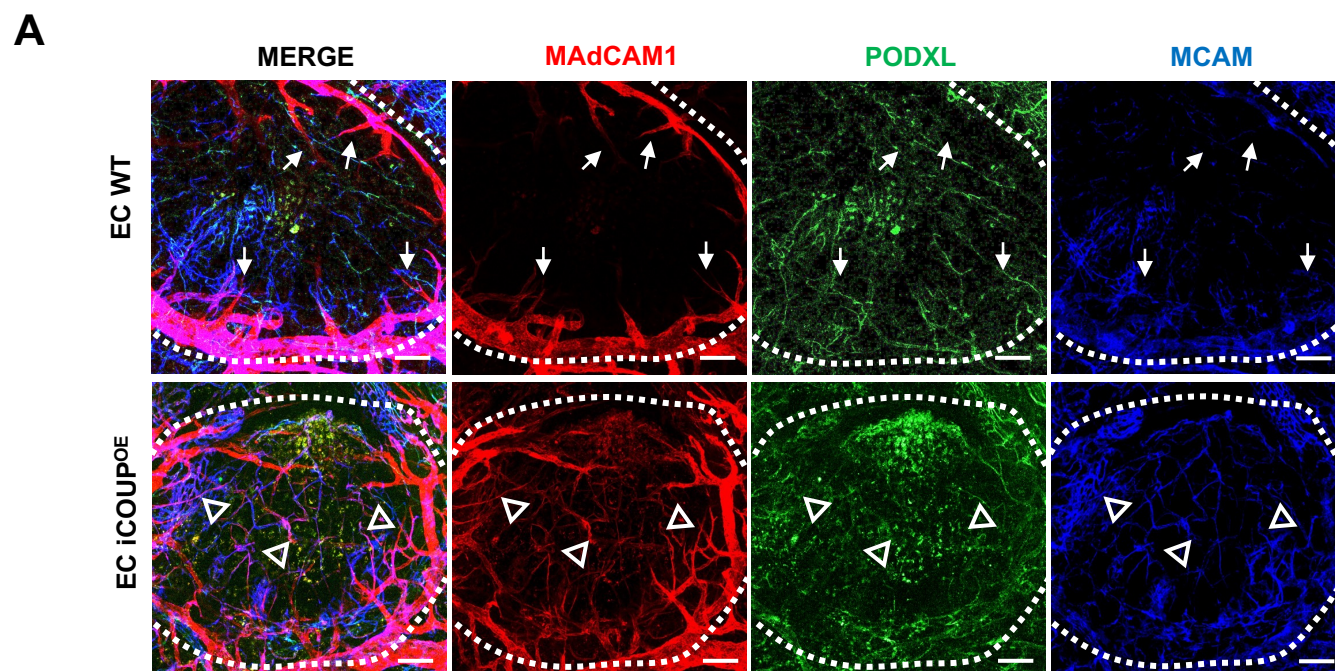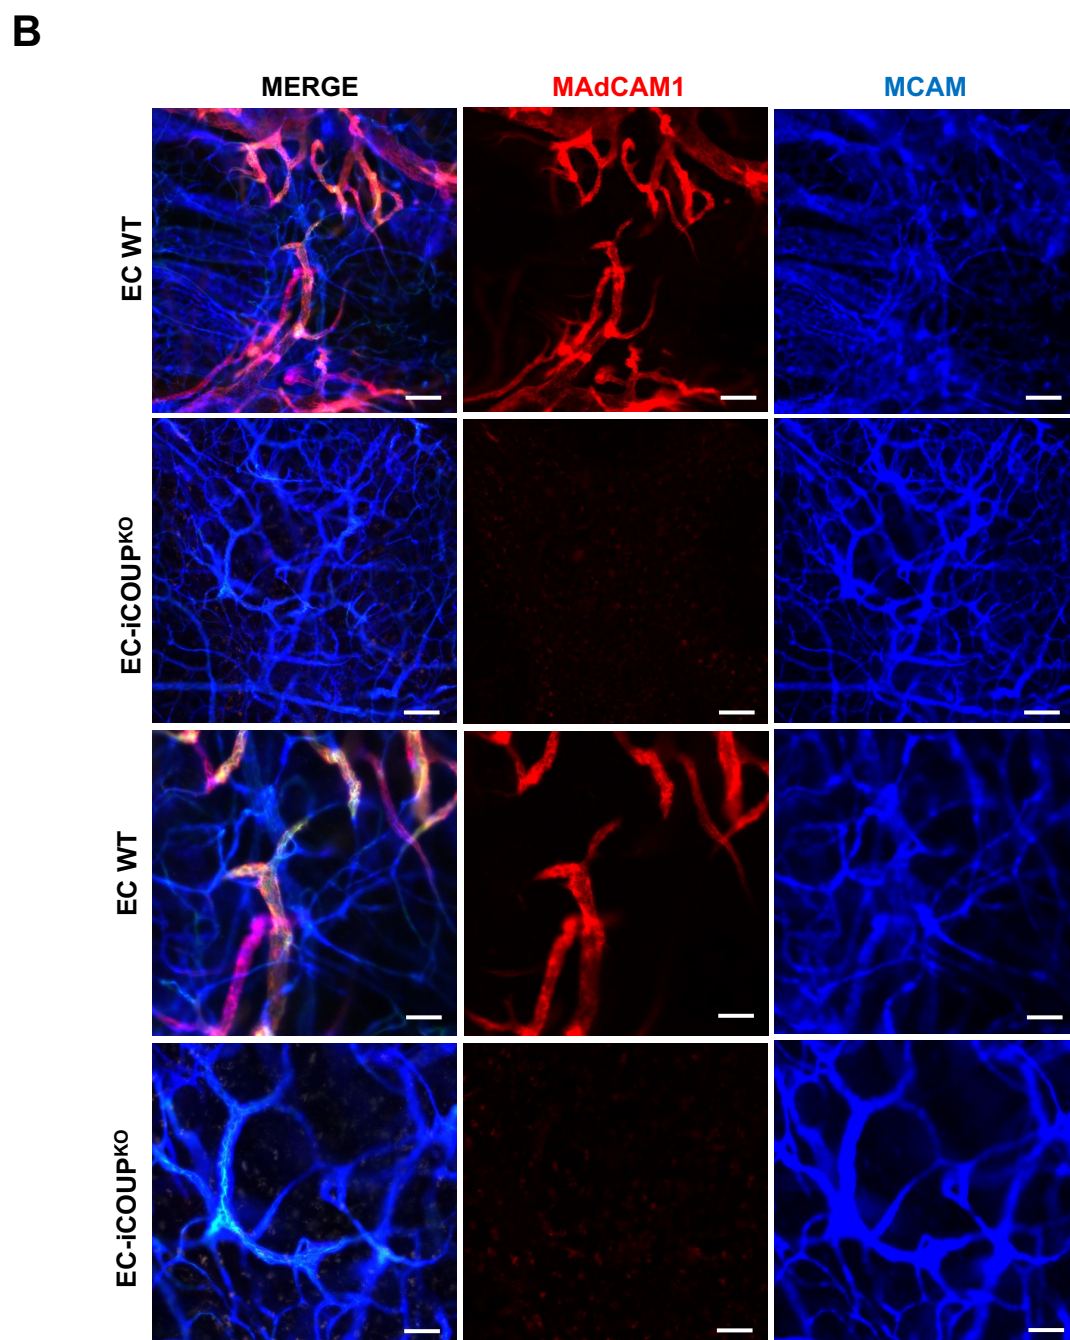

**Figure S6. Abnormalities of MAdCAM1 expression in PP of in EC-iCOUP<sup>OE</sup> and EC-iCOUP<sup>KO</sup> mice.**

(A) Confocal image showing MAdCAM1 extension from HEV into capillaries within the PP of EC-iCOUP<sup>OE</sup> (arrowheads) but not control WT mice (arrows). Scale bars: 100 $\mu$ m, 20x, whole mount, 14 dpi.

(B) Confocal image showing distinct patterns of loss of MAdCAM1 in PP HEV in EC-iCOUP<sup>KO</sup> vs control WT mice. Scale bars: 100 $\mu$ m, 10x (top two rows), 50 $\mu$ m, 20x (bottom two rows, same section as top two rows); whole mount imaging.

A

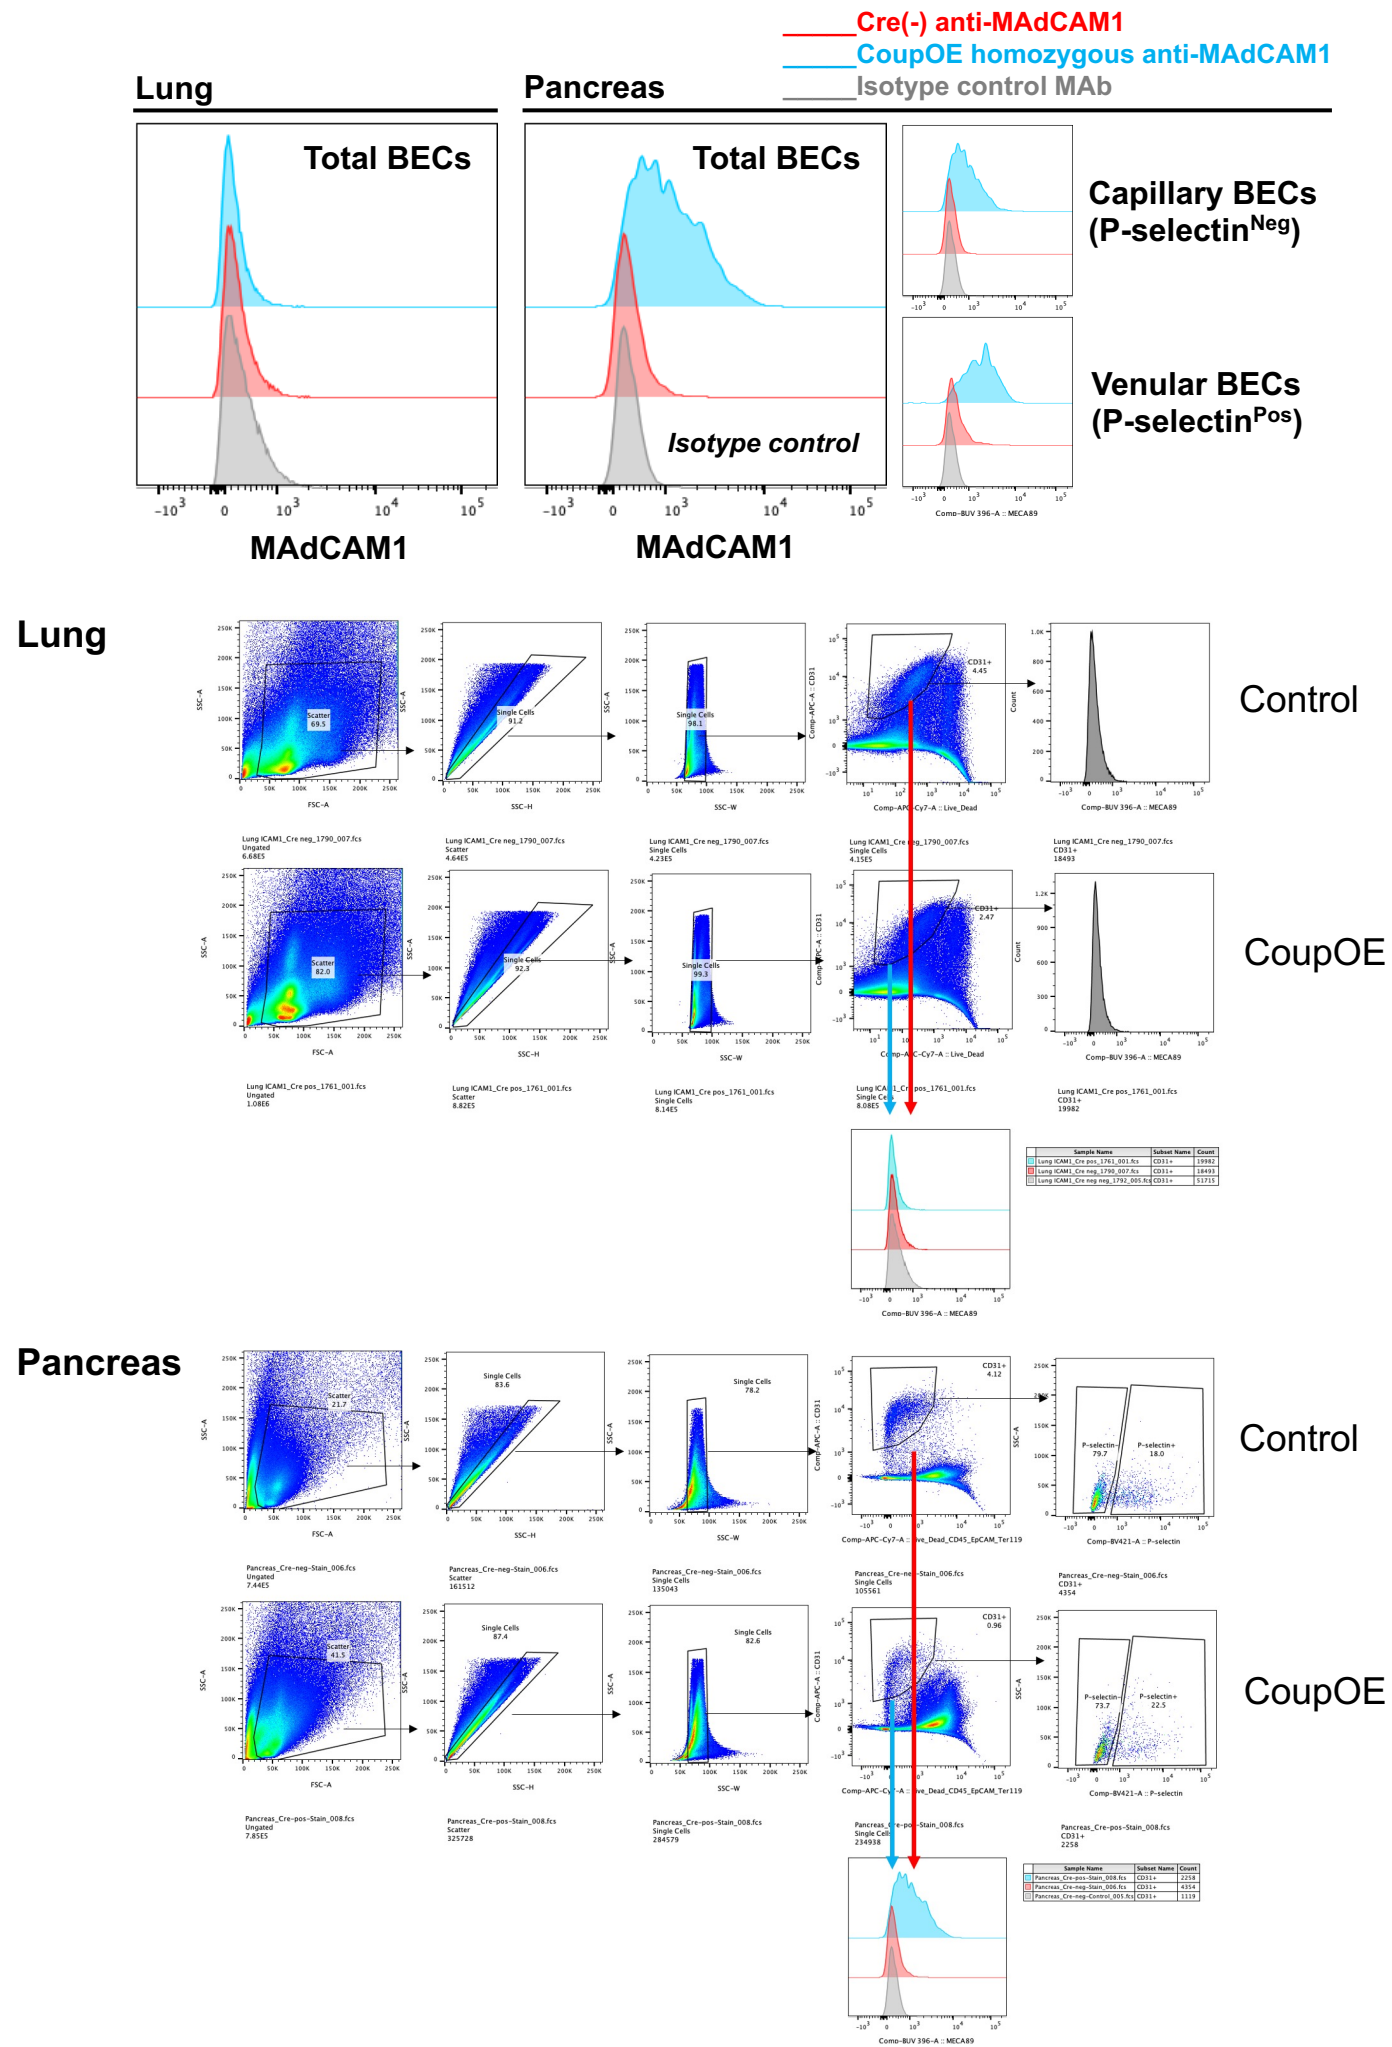

B

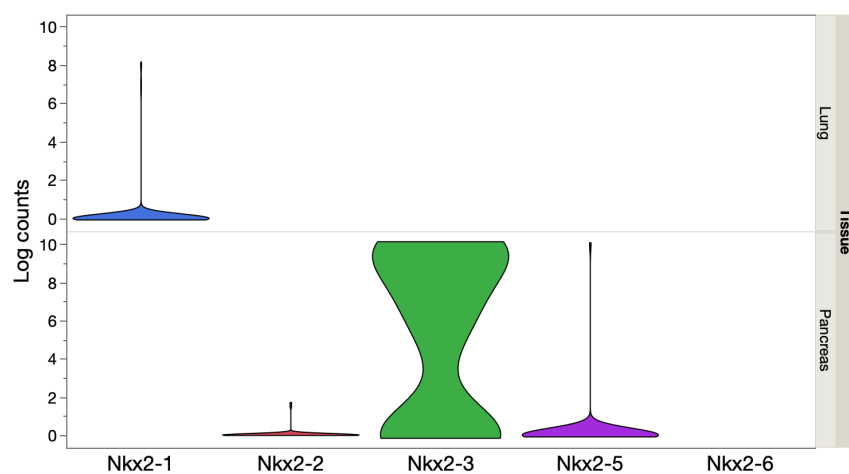

**Figure S7. Ectopic expression of MAdCAM1 in the pancreas of EC-iCOUP<sup>OE</sup> mice.**

(A) Histograms showing absence of MAdCAM1 in lung BEC and ectopic expression of MAdCAM1 in pancreatic BEC in EC-iCOUP<sup>OE</sup> mice and gating strategy for FACS.

(B) Violin plots of single-cell expression of *Nkx2* family genes in lung and pancreatic BEC (data from Tabula Muris Senis).



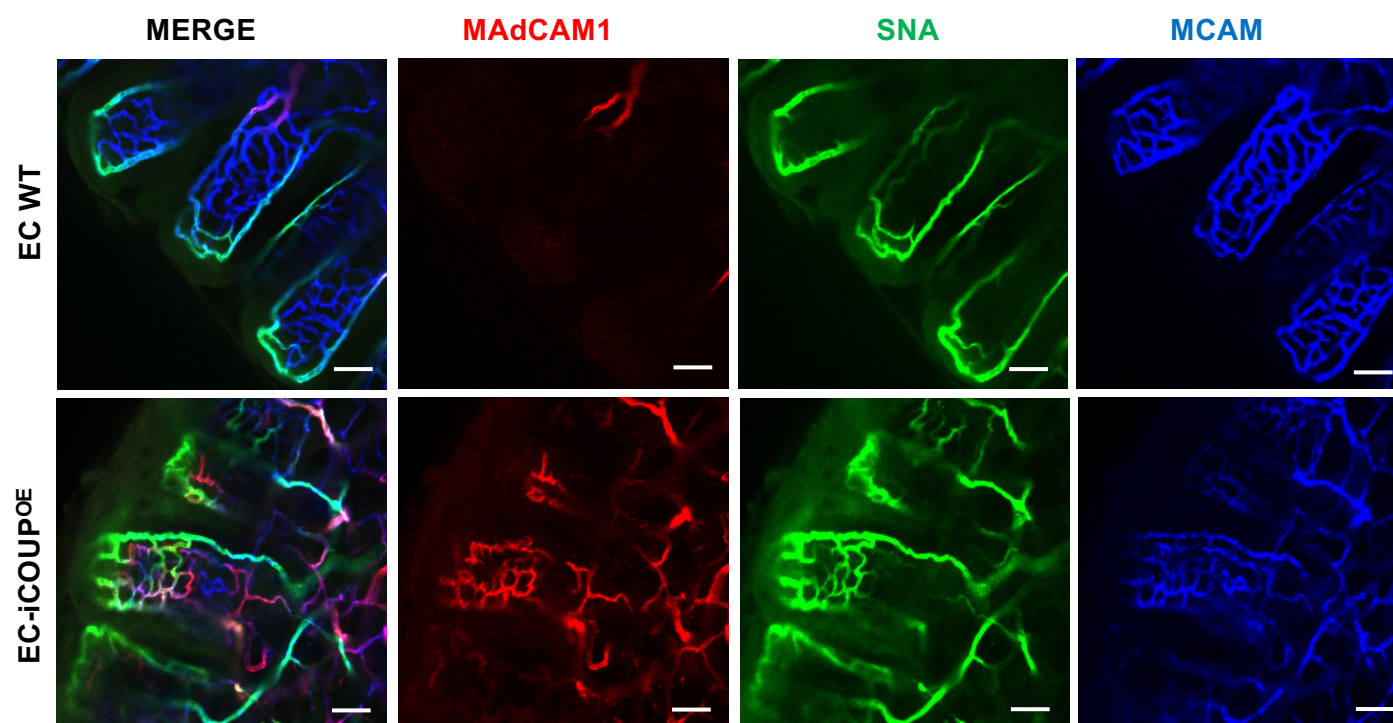

**Figure S8. Ectopic co-expression of MAdCAM1 and SNA-binding glycotopes in the villus capillary network in EC-iCOUP<sup>OE</sup> mice.**

Confocal image showing distinct patterns of MAdCAM1 staining and SNA binding by lamina propria capillaries in EC-iCOUP<sup>OE</sup> vs control WT mice. Scale bars: 50 $\mu$ m, 20x, whole mount, 19 dpi.

**NKX:COUP-TFII motif in endocardial and atrial genes that control cell specification (*Etv2*, *Tbx5*)**

***Etv2***

|           |                  | <b>NKX2-5</b>                                   | <b>COUP-TFII</b> |
|-----------|------------------|-------------------------------------------------|------------------|
| hEtv2Pro  | chr19:35,642,021 | CTGCAACT <b>TGAGCC</b> TGGCTG <b>CGACCC</b> CTG |                  |
| cEtv2Pro  | chr19:33,592,416 | CTGCAACT <b>TGAGCC</b> TGGCTG <b>CGACCC</b> CTG |                  |
| bEtv2Pro  | chr19:35,062,091 | CTGCAACT <b>TGAGCC</b> TGGCTG <b>CGACCC</b> CTG |                  |
| raEtv2Pro | chr1: 89,093,789 | CTGCAACT <b>TGACCC</b> AGGCTG <b>CGACCC</b> CCA |                  |
| mEtv2Pro  | chr7: 30,636,189 | CTGCAACT <b>TGACCC</b> AGGCTG <b>CGACCC</b> CCA |                  |
|           |                  | ***** **:****** .                               |                  |

***Tbx5***

|           |                   | <b>COUP-TFII</b>                                      | <b>NKX2-5</b> |
|-----------|-------------------|-------------------------------------------------------|---------------|
| hTbx5IVS  | chr12:114,841,156 | GGCCTGAATCGGCCGC <b>TGACCT</b> GGCC <b>CTTATTAAGA</b> |               |
| cTbx5IVS  | chr12:112,068,880 | GGCCTGAATCGGCCGC <b>TGACCT</b> GGCC <b>CTTATTAAGA</b> |               |
| rTbx5IVS  | chr11:114,126,855 | GGCCTGAAGCGGCCGC <b>TGACCT</b> GGCC <b>CTTATTAAGA</b> |               |
| raTbx5IVS | chr12:42,100,282  | GGCCTGAAGCGGCCGC <b>TGACCC</b> GACC <b>CTTAATAAG</b>  |               |
| mTBX5IVS  | chr5:119,837,348  | GGCCTGAAGCGGCCGC <b>TGACCC</b> GACC <b>CTTAATAAGG</b> |               |
|           |                   | ***** ***** *.*****:****.                             |               |

**NKX:COUP-TFII motif in interneuronal gene that controls cell migration (*Nrp2*)**

***Nrp2***

|           |                                                     | <b>NKX2-1</b> | <b>COUP-TFII</b> |
|-----------|-----------------------------------------------------|---------------|------------------|
| mNrp2IVS  | GAATG <b>TTGCCAAATTATGTGACCT</b> TTGGCAGACCAGCTGTGC |               |                  |
| raNrp2IVS | GAATGTTGCCAA <b>ATTATGTGACCT</b> TTGGCAGACCAGCTGTGC |               |                  |
| hNrp2IVS  | GAACATTGCCAA <b>ATTATGTGACCT</b> TTGGCAGACCAGCTGTGC |               |                  |
| cNrp2IVS  | GAACATTGCCAA <b>ATTATGTGACCT</b> TTGGCAGACCAGCTGTGC |               |                  |
| rNrp2IVS  | GAACGTTGCCAA <b>ATTATGTGACCT</b> TTGGCAGACCAGCTGTGC |               |                  |
|           | *** .*****                                          |               |                  |

**Figure S9. Conserved NCCE in select genes controlled by NKX and COUP-TFII in cardiac or neuronal development.**

Alignment of candidate NCCE sequences from the promoter region of *Etv2* or the intronic regions of *Tbx5* and *Nrp2* across species. h, human; c, chimpanzee; b, baboon; r, rhesus monkey; ra, rat; m, mouse. Pro, promoter; IVS, intron. COUP-TFII and NKX family HD binding sites are highlighted in green and purple, respectively.

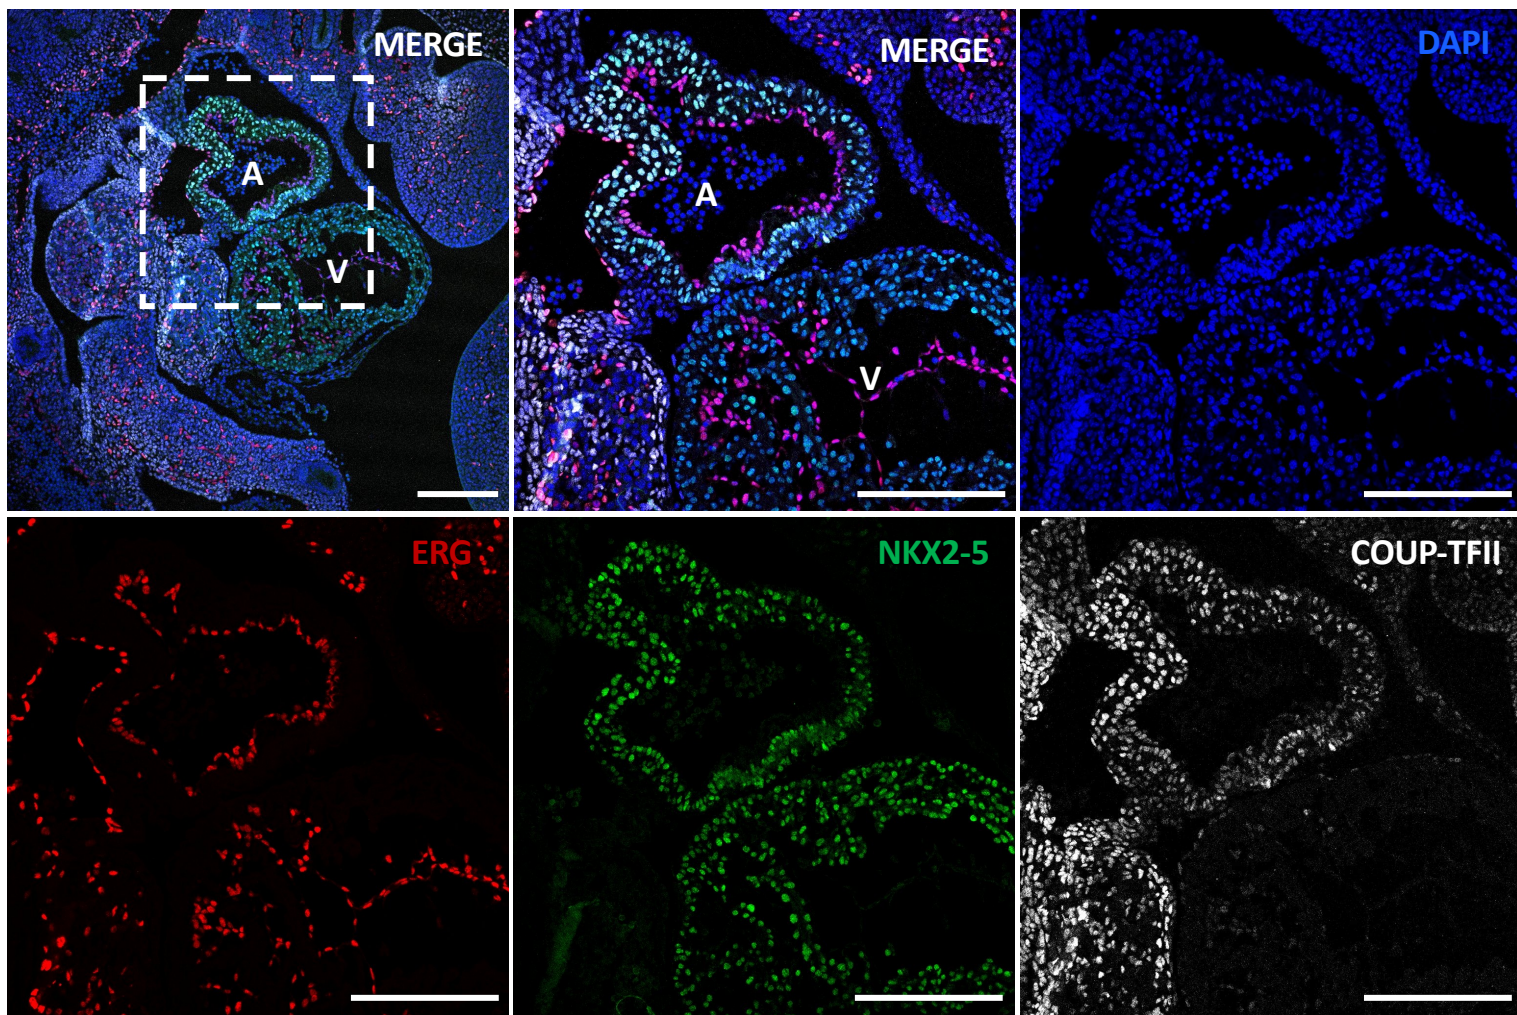

**Figure S10. NKX2-5 and COUP-TFII co-localize in the developing mouse atrium.**

Representative image of mouse heart (e10) stained for DAPI (blue), ERG (red), NKX2-5 (green) and COUP-TFII (white). Scale bars: 200  $\mu$ m. A, atrium; V, ventricle.



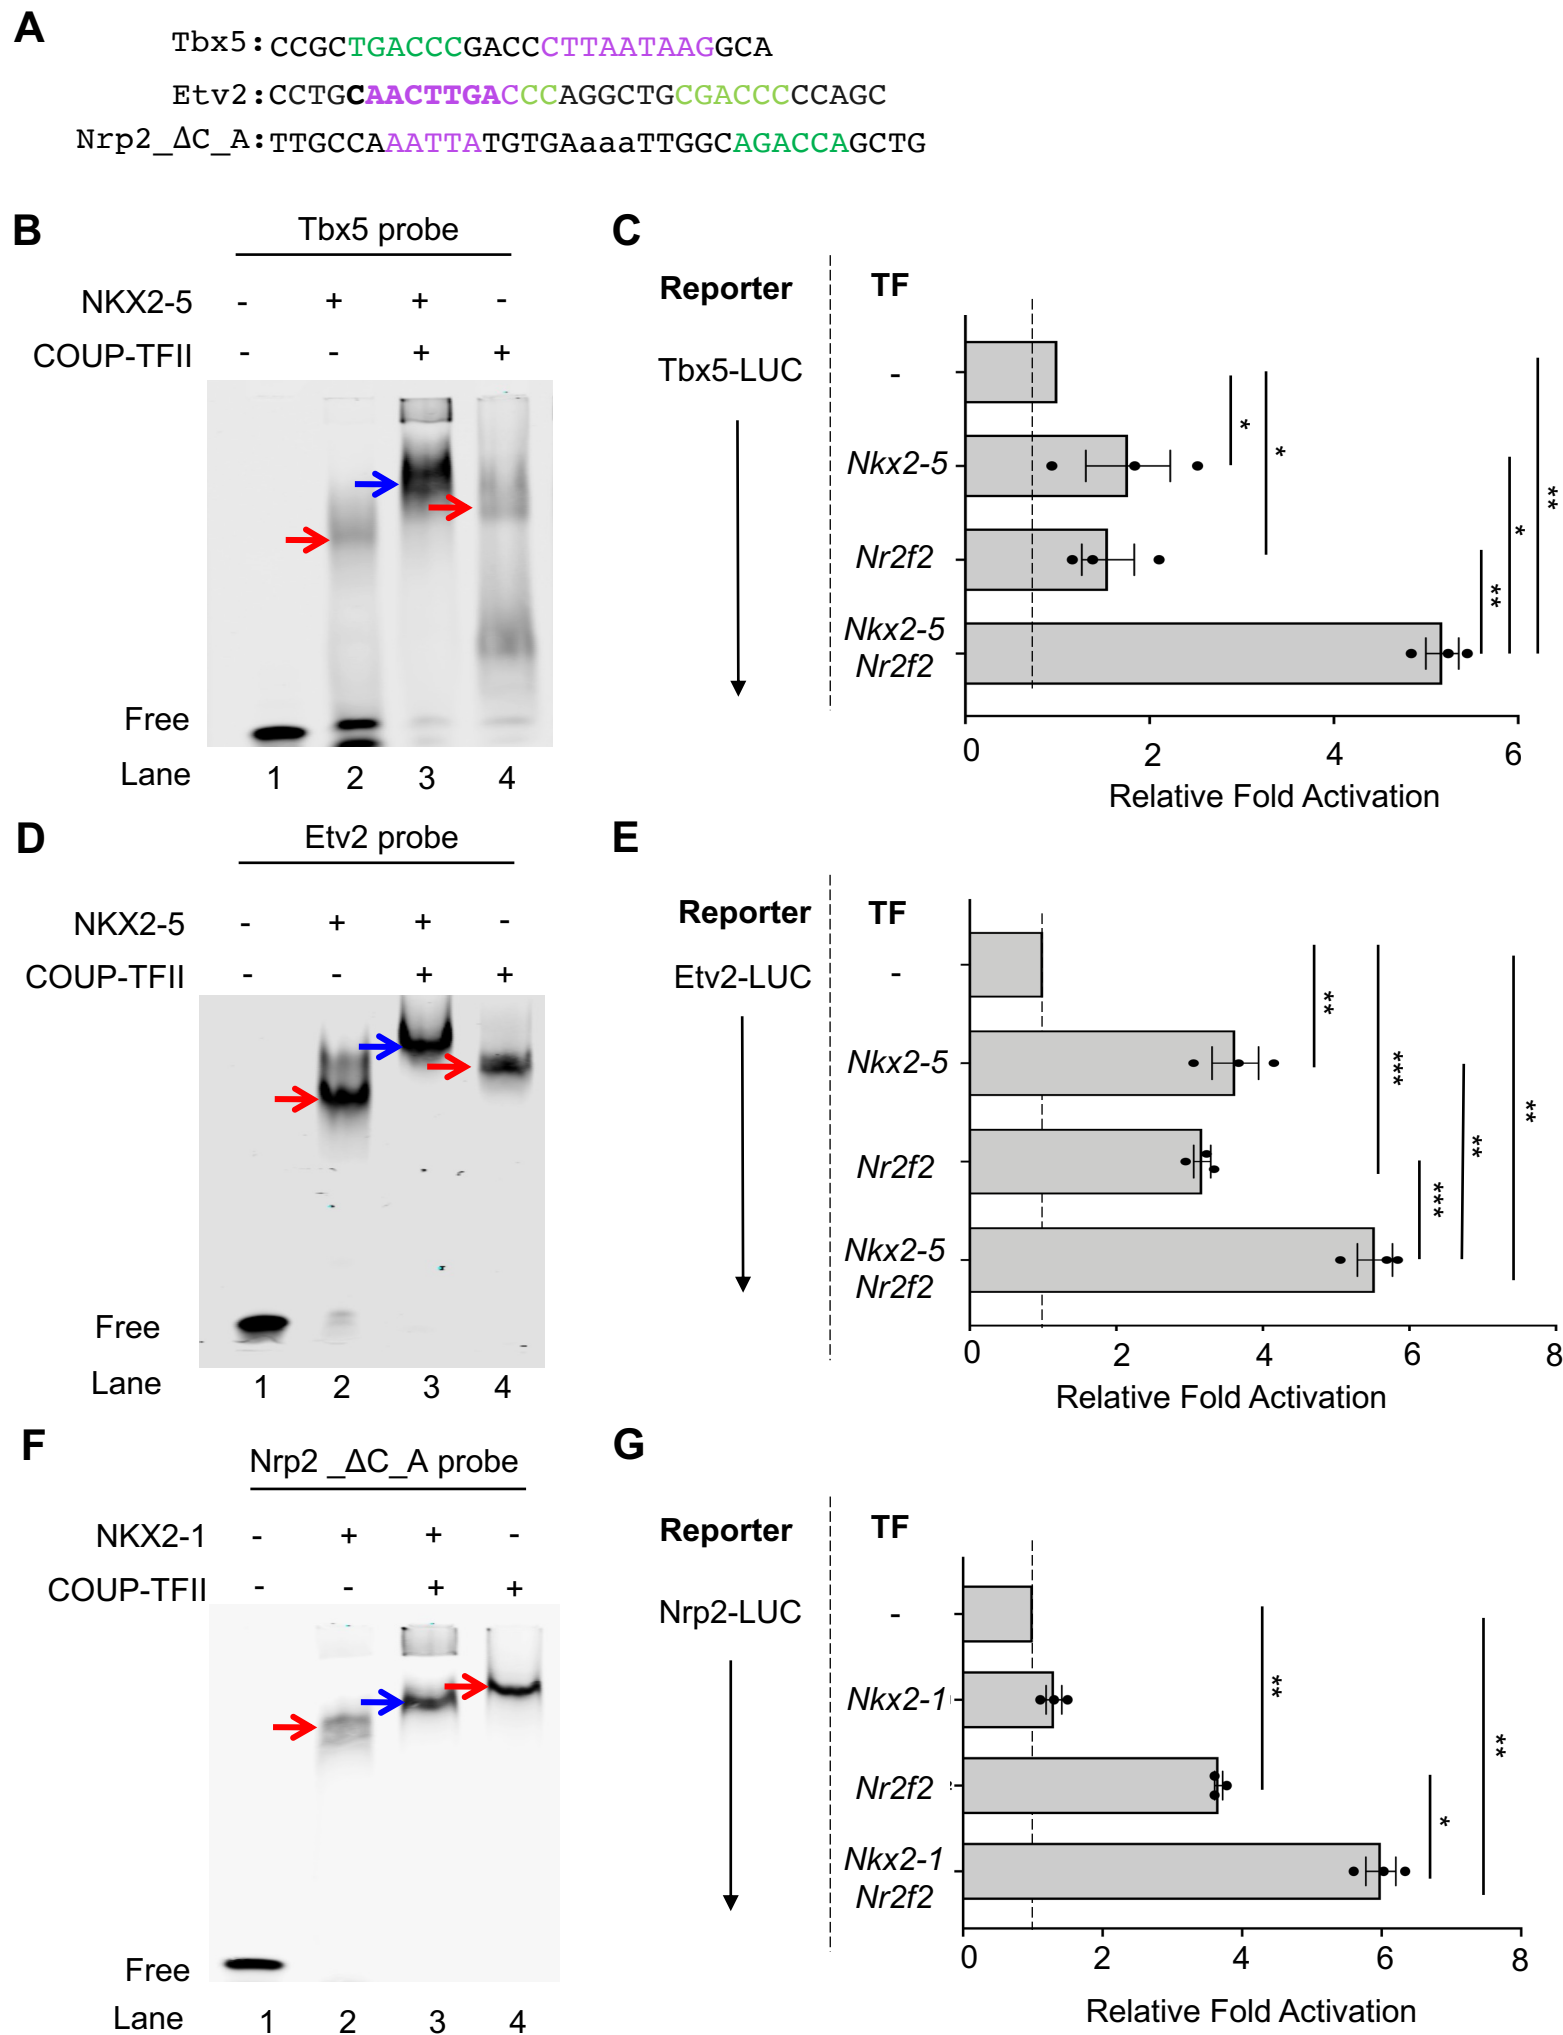

**Figure S11. Conserved NCCE in *Tbx5*, *Etv2* and *Nrp2* promoters support combinatorial control of transcription by NKX2-5 or NKX2-1 and COUP-TFII.**

(A) Sequence of probes used for EMSA.

(B, D, F) Binding of recombinant COUP-TFII and NKX2-5 or NKX2-1 to the *Tbx5* (B), *Etv2* (D) and *Nrp2* (F) NCCE probes. Heterodimeric complexes are indicated by blue arrows.

(C, E, G) Activity of luciferase reporters driven by NCCE-containing *Tbx5* (C), *Etv2* (E) or *Nrp2* (G) promoter, with or without *Nr2f2*, *Nkx2-5* or *Nkx2-1*.

All data are mean  $\pm$  SEM from three independent experiments, each with 3 technical replicates. \*: p-value < 0.05, \*\*: p-value < 0.01, \*\*\*: p-value < 0.005; two tailed t-tests, paired.

## Supplementary Table S1. Primers and probes

| Name                      | Sequence (5'-->3')                          | Application                                                                                    |
|---------------------------|---------------------------------------------|------------------------------------------------------------------------------------------------|
| MadR1_CE-F                | CCATGCACTTGACCCACCATGGTGACCCACCTCC          | EMSA                                                                                           |
| MadR1_CE-R                | GGAGGTGGGTCAACCATGGTGGGTCAAGTGCATGG         | EMSA                                                                                           |
| MadR1_CE_ΔE/N-F           | CCATGgtCTTGACCCACCATGGTGACCCACCTCC          | EMSA                                                                                           |
| MadR1_CE_ΔE/N-R           | GGAGGTGGGTCAACCATGGTGGGTCAAGacCATGG         | EMSA                                                                                           |
| MadR1_CE_ΔC_B-F           | CCATGCACTTGACCCACCATGGgacGGCACCTCC          | EMSA                                                                                           |
| MadR1_CE_ΔC_B-R           | GGAGGTGCCgtcCCATGGTGGGTCAAGTGCATGG          | EMSA                                                                                           |
| MadR1_CE_ΔC_A-F           | CCATGCACTTGAAAAAaATGGTGACCCACCTCC           | EMSA                                                                                           |
| MadR1_CE_ΔC_A-R           | GGAGGTGGGTCAACCATttTttTCAAGTGCATGG          | EMSA                                                                                           |
| MadR1_CE_ΔC_AB-F          | CCATGCACTTGAAAAAaATGGaaAaaCACCTCC           | EMSA                                                                                           |
| MadR1_CE_ΔC_AB-R          | GGAGGTGttTtCCATttTttTCAAGTGCATGG            | EMSA                                                                                           |
| MadR1_CE_ΔN_ΔC_A-F        | CCATGgtCTTGAAAAAaATGGTGACCCACCTCC           | EMSA                                                                                           |
| MadR1_CE_ΔN_ΔC_A-R        | GGAGGTGGGTCAACCATttTttTCAAGacCATGG          | EMSA                                                                                           |
| mETV2-F                   | CCTGCAACTTGACCCAGGCTGCGACCCCCAGC            | EMSA                                                                                           |
| mETV2-R                   | GCTGGGGTGCAGCAGCTGGGTCAAGTTGCAGG            | EMSA                                                                                           |
| mSt6gal1 CE-F             | GAGGCTGGTCAGAGAAAGTGTGAAAAG                 | EMSA                                                                                           |
| mSt6gal1 CE-R             | CTTTTCACACTTCTCTGACCAGCCTC                  | EMSA                                                                                           |
| mSt6gal1 CE_ΔN-F          | GAGGCTGGTCAGAGAAAAAAG                       | EMSA                                                                                           |
| mSt6gal1 CE_ΔN-R          | CTTTTttttTTCTCTGACCAGCCTC                   | EMSA                                                                                           |
| mSt6gal1 CE_ΔC-F          | GAGGCTaaaaAGAGAAAGTGTGAAAAG                 | EMSA                                                                                           |
| mSt6gal1 CE_ΔC-R          | CTTTTCACACTTCTCTtttAGCCTC                   | EMSA                                                                                           |
| NRP2-F                    | TTGCCAAATTATGTGACCTTTGGCAGACCAGCTG          | EMSA                                                                                           |
| NRP2-R                    | CAGCTGGTCTGCCAAAGGTCACATAATTTGGCAA          | EMSA                                                                                           |
| Nrp2_ΔC-F                 | TTGCCAAATTATGTGAaaaTTGGCAaaaaAGCTG          | EMSA                                                                                           |
| Nrp2_ΔC-R                 | CAGCTttttTGCCAAttTCACATAATTTGGCAA           | EMSA                                                                                           |
| Nrp2_ΔN-F                 | TTGCgtAAggAgGTGACCTTTGGCAGACCAGCTG          | EMSA                                                                                           |
| Nrp2_ΔN-R                 | CAGCTGGTCTGCCAAAGGTCACcTccTTacGCAA          | EMSA                                                                                           |
| Nrp2_ΔC_A-F               | TTGCCAAATTATGTGAaaaTTGGCAGACCAGCTG          | EMSA                                                                                           |
| Nrp2_ΔC_A-R               | CAGCTGGTCTGCCAAttTCACATAATTTGGCAA           | EMSA                                                                                           |
| Tbx5-F                    | CCGCTGACCCGACCCCTTAATAAGGCA                 | EMSA                                                                                           |
| Tbx5-R                    | TGCCTTATTAAGGGTCGGGTCAGCGG                  | EMSA                                                                                           |
| Tbx5_ΔC-F                 | CCGCTGAaaaaACCCCTTAATAAGGCA                 | EMSA                                                                                           |
| Tbx5_ΔC-R                 | TGCCTTATTAAGGGTttttTCAGCGG                  | EMSA                                                                                           |
| Tbx5_1m2-F                | CCGCTGACCCGACCCCTggggAAGGCA                 | EMSA                                                                                           |
| Tbx5_1m2-R                | TGCCTTccccAGGGTCGGGTCAGCGG                  | EMSA                                                                                           |
| NRP2-F                    | TTGCCAAATTATGTGACCTTTGGCAGACCAGCTG          | EMSA                                                                                           |
| NRP2-R                    | CAGCTGGTCTGCCAAAGGTCACATAATTTGGCAA          | EMSA                                                                                           |
| Hey1_pet21-F              | CGGGATCCatgaagagagctcaccagac                | for pet21A cloning; has BamHI site                                                             |
| Hey1_pet21-R              | TCGGAATTCGgaaagctccgatctctgtc               | for pet21A cloning; has EcoRI site+2nt to keep in frame                                        |
| nkx_pet21-F               | CGGAATTCatgatgtaccaag cccggtc               | for pet21A cloning; has EcoRI site                                                             |
| nkx_pet21rev-R            | TCAAGCTTCCcaagcctgatgcccctgcaaaag           | for pet21A cloning; has HindIII site +1nt to keep in frame                                     |
| nr2f2/coup_pet21-F        | CGGGATCCatggca atggtagtca gcacg             | for pet21A cloning; has BamHI site                                                             |
| nr2f2/coup_pet21-R        | TCGGAATTCGgtgaattgcatatatggc                | for pet21A cloning; has EcoRI site+2nt to keep in frame                                        |
| nr2f2_pgex2TK-R           | CCGGAATTCGGTtgaattgcatatatggc               | for pGEX2TK cloning has EcoRI site; use nr2f2_pet21A-F for forward primer which has BamHI site |
| nkx2.3Δ2_24_pet21A-F      | CGGAATTCatgcacttccacggagctcacttgc           | for pet21A cloning; has EcoRI site; has aa2-24 missing added atg; use nkxpet21rev-R primer     |
| nkx2-5_pet21A-F           | CGGGATCCatgttccccag ccttgcgctc acac         | for pet21A cloning; has BamHI site                                                             |
| nkx2-5_pet21A-R           | TCGGAATTCGccaggctcggatgccgtgcagcgtg         | for pet21A cloning; has EcoRI site+2nt to keep in frame                                        |
| mNFKBCE_LUC pGL4.10-F     | aaaggtaccGCACCATCCAGAACCAGGCCAG             | has KpnI site; NFKBCE_LUC for LUC reporter                                                     |
| mNFKBCE_LUC pGL4.10-R     | aaaaagcttCTCTGTCTTGTGACCGCCAGGGGAAG         | has HindIII site; NFKBCE_LUC for LUC reporter                                                  |
| mCE_LUC pGL4.10-F         | CTCGGTACCGtcatagaaccggggcc                  | has KpnI site; CE_LUC for LUC reporter                                                         |
| mCE_LUC pGL4.10-R         | aaaaagcttCTCTGTCTTGTGACCGCCAGGGGAAG         | has HindIII site; CE_LUC for LUC reporter                                                      |
| mMAD_SDMm1-F              | gactggcagatttccatgGTcttgaccaccatgggta       | mutated Nkx binding site; LUC reporter                                                         |
| mMAD_SDMm1-R              | tcaccatggtgggtcaagACcatggaaatctgccagtc      | mutated Nkx binding site; LUC reporter                                                         |
| mMAD_SDMm5-F              | ccatgcacttgaAAAAAaAtggAAaAAcacctccagcttttag | mutated COUP-TFII binding site; LUC reporter                                                   |
| mMAD_SDMm5-R              | ctaaaagctggaggtgTTtTTccatTTtTTTcaagtgcagtg  | mutated COUP-TFII binding site; LUC reporter                                                   |
| MadChIP_R1-F              | actcaggccccagaacaact                        | ChIP-qPCR                                                                                      |
| MadChIP_R1-R              | tacgggaaggctgaagctaa                        | ChIP-qPCR                                                                                      |
| GenCtrl4-F                | ggatggggcgcacgtacag                         | ChIP-qPCR; 3' of TPGS (genomic control)                                                        |
| GenCtrl4-R                | acgaattccagcagcaaaa                         | ChIP-qPCR; 3' of TPGS (genomic control)                                                        |
| mMad_SDMPCR-F             | GGCACAGCTCTAGTCAGCGAGGTG                    | Colony PCR for SDM of LUC reporter                                                             |
| mMad_SDMPCR-R             | GAACACAGTCATTACAGATGGGGA                    | Colony PCR for SDM of LUC reporter                                                             |
| MadqRT-PCR-HeI-F          | CTGAGCCCTACATCCTGACCT                       | Real-Time RT-PCR Madcam1                                                                       |
| MadqRT-PCR-HeI-R          | GCTTCACAGAGTAGCTCCAG                        | Real-Time RT-PCR Madcam1                                                                       |
| hCE_NFκB LUC pGL4.10      | GGACCCGCCGTCGGGGTGGGGGCGG                   | Start sequence for custom Cyagen vector                                                        |
| <b>Commercial primers</b> |                                             |                                                                                                |
| Sino Biological           | MP200715                                    | ST6GAL1 qPCR Primer Pairs, Mouse                                                               |
| Qiagen                    | PPM02945B-200                               | b actin qPCR Primer Pairs, Mouse                                                               |



## Supplementary Table S2. List of Antibodies

| Name                                                    | Company                   | Cat #       | Application            | Dilution                                 |
|---------------------------------------------------------|---------------------------|-------------|------------------------|------------------------------------------|
| Nkx2-3 (O-21)                                           | Santa Cruz Biotechnology  | sc-133826   | WB                     | 1:100                                    |
| Nkx2-3 (S-16)                                           | Santa Cruz Biotechnology  | sc-83438x   | EMSA                   | 1:10                                     |
| Nkx2-3                                                  | Atlas Antibodies          | HPA047561   | IHC, PLA, IF           | 1:100 (IHC & IF); 1:75 (PLA)             |
| COUP-TFII                                               | Perseus Proteomics        | PP-H7147-00 | IHC, PLA, ChIP, WB, IF | 1:100 for everything except<br>EMSA 1:10 |
| MAdCAM1 (MECA367)                                       | in house                  | N/A         | IF, ELISA              | 1:100; 25ug (IF)                         |
| MAdCAM1 (MECA89)                                        | in house                  | N/A         | FACS, IF               | 1:50 (FACS); 25ug (IF)                   |
| PLVAP (MECA32)                                          | in house                  | N/A         | ELISA                  | 1:100                                    |
| MAdCAM1                                                 | R&D Systems               | AF-993      | IHC, WB                | 1:100                                    |
| Erg-488                                                 | Abcam                     | 196374      | PLA                    | 1:100                                    |
| Erg-647                                                 | Abcam                     | ab196149    | IF                     | 1:100                                    |
| CD146                                                   | BD Biosciences            | 740095      | IF                     | 30uL injected                            |
| ly6c apc cy7                                            | biolegend                 | 128026      | FACS                   | 1:100                                    |
| gp38 PeCy7 Ab                                           | Biolegend                 | 127412      | FACS                   | 1:100                                    |
| cd11b PerCP cy5.5 ab                                    | eBioscience               | 550993      | FACS                   | 1:100                                    |
| Cd11a/cd18 PerCP Cy5.5 Ab                               | Biolegend                 | 141008      | FACS                   | 1:100                                    |
| CD45 PerCP Cy5.5 Ab                                     | Biolegend                 | 103132      | FACS                   | 1:100                                    |
| Nkx2-1 Ab                                               | Biopat Immunotechnologies | PA0100      | EMSA                   | 1:10                                     |
| nkx2-5 Ab                                               | Santa Cruz                | sc-376565X  | EMSA                   | 1:10                                     |
| PerCP/Cy5.5 anti-mouse TER-119/Erythroid Cells Antibody | Biolegend                 | 116228      | FACS                   | 1:100                                    |
| CD31 BV605                                              | Biolegend                 | 102427      | FACS                   | 1:100                                    |
| SIRPa PerCP cy5.5 Ab                                    | Biolegend                 | 144009      | FACS                   | 1:100                                    |
| M99 (Podoplanin) 633                                    | In house                  |             | FACS                   | 1:100                                    |
| tff-1 (NKX2-1 AB)                                       | Santa Cruz                | SC-53136    | EMSA                   | 1:10                                     |
| percpCy5.5 anti-mouse CD326 (EPCAM) clone G8.8          | Biolegend                 | 118219      | FACS                   | 1:100                                    |
| Sambucus Nigra Lectin (SNA, EBL), Fluorescein           | Vector laboratories       | FL-1301-2   | IF                     | 3ug/ml                                   |
| SNA-Cy3                                                 | Vector laboratories       | CL-1303     | IF                     | 1:100                                    |
| Erg                                                     | Abcam                     | ab92513     | IF                     | 1:100                                    |
| Nkx2-5                                                  | Santa Cruz                | sc-8697     | IF                     | 1:100                                    |
| M79-DL633                                               | In house                  |             | IF                     | 25ug                                     |
| Prolong Gold antifade reagent                           | Invitrogen                | P36934      | IF                     |                                          |

### Supplementary Table S3. List of plasmids

| Name                                                        | Company  | Cyagen Vector ID        |
|-------------------------------------------------------------|----------|-------------------------|
| mCE_NFκB LUC pGL4.10                                        | in house |                         |
| mNFκB-LUC pGL4.10                                           | in house |                         |
| Nkx2-3                                                      | ABM      |                         |
| Nr2f2                                                       | ABM      |                         |
| Hey1                                                        | ABM      |                         |
| NKX2-3 pET21A                                               | in house |                         |
| HEY1-pET21A                                                 | in house |                         |
| COUP-TFII-pET21A                                            | in house |                         |
| COUP-TFII-pGEX2TK                                           | in house |                         |
| NKX2-1 pET21A                                               | Cyagen   | VB150629-10021          |
| NKX2-5 pET21A                                               | in house |                         |
| pLV[Exp]-EGFP:T2A:Puro-EF1A>{mNkx2-3[NM_008699.2]}*(1-24aa) | Cyagen   | VB170302-1081wyz        |
| eGFP vector control for Nkx-TN OE; pLV[Exp]-Puro-CMV>EGFP   | Cyagen   | VB170302-1030htt        |
| Nkx2-3 shRNA lines                                          | Origene  |                         |
| Nr2f2 shRNA lines                                           | Origene  |                         |
| Control shRNA line                                          | Origene  |                         |
| St6Gal1-LUC pGI4.23                                         | Cyagen   | <u>VB190420-1028twv</u> |
| St6Gal1ΔCoup-LUC pGL4.23                                    | Cyagen   | <u>VB190420-1029bwr</u> |
| CE_ΔN NFκB LUC pGL4.10                                      | in house |                         |
| CE_ΔC_A LUC pGL4.10                                         | Cyagen   | <u>VB190513-1157phx</u> |
| CE_ΔC_B LUC pGL4.10                                         | Cyagen   | <u>VB190513-1160uqw</u> |
| mCE-LUC pGL4.23                                             | Cyagen   | <u>VB190513-1166pry</u> |
| hCE-LUC pGL4.23                                             | Cyagen   | <u>VB190513-1167ruw</u> |
| Nrp2-LUC pGL4.23                                            | Cyagen   | VB190420-1031gqm        |
| Tbx5-LUC pGL4.23                                            | Cyagen   | VB190420-1033frx        |
| hCE_NFκB LUC pGL4.10                                        | Cyagen   | VB190513-1159whr        |
| pGL4.23-minP>luc2                                           | Cyagen   | VB190507-1247jqg        |
