# Supplementary material for: An NKX-COUP-TFII morphogenetic code directs mucosal endothelial addressin expression
Source: PubMed Central journal article supplement (PMC9718832; doi:10.1038/s41467-022-34991-2), 2022-12-02
Supplement: 41467_2022_34991_MOESM3_ESM.pdf [file 41467_2022_34991_MOESM3_ESM.pdf]

## **Description of Additional Supplementary Files**

File Name: Supplementary Data 1

Description: NCCE loci in the mouse and human genomes.
